# Supplementary material for: Intrinsic Seebeck coefficients of 2D polycrystalline PtSe2semiconducting films through two-step annealing
Source: Royal Society of Chemistry journal article supplement (doi:10.1039/d2ta10079g), 2023-01-01
Supplement: d2ta10079g1.pdf [file d2ta10079g1.pdf]

## Electronic Supplementary Informatin (ESI)

### Intrinsic Seebeck Coefficients of 2D Polycrystalline PtSe<sub>2</sub> Semiconducting Films through Two-Step Annealing

*Min-Jeong Kim<sup>1\*</sup>, Won-Yong Lee<sup>2\*</sup>, Min-Sung Kang<sup>1</sup>, Si-Hoo Kim<sup>1</sup>, Jung-Min Cho<sup>1</sup>,  
Yun-Ho Kim<sup>1</sup>, Jae-Won Choi<sup>1</sup>, No-Won Park<sup>1</sup>, Gil-Sung Kim<sup>1</sup>, Young-Gui Yoon<sup>1</sup>, and  
Sang-Kwon Lee<sup>1\*\*</sup>*

<sup>1</sup> *Department of Physics and Center for Berry Curvature based New Phenomena, Chung-Ang University, Seoul 06974, Republic of Korea*

<sup>2</sup> *Division of Solid-State Electronics, Department of Electrical Engineering, Uppsala University, Uppsala 75103, Sweden*

\* These authors contributed equally to this work

\*\*Address correspondence to [sangkwonlee@cau.ac.kr](mailto:sangkwonlee@cau.ac.kr)

# 1. Parameters used in the COMSOL simulation

**Table S1.** Material parameters for COMSOL calculation of the temperature distribution

| Material                                             | Density [kg/m <sup>3</sup> ] | Heat capacity at constant pressure [ $C_p$ , J/kg·K] | Thermal conductivity [W/m·K]    |
|------------------------------------------------------|------------------------------|------------------------------------------------------|---------------------------------|
| Sapphire substrate (Al <sub>2</sub> O <sub>3</sub> ) | 3,980 <sup>1</sup>           | 779.15*                                              | 40 <sup>1</sup>                 |
| PtSe <sub>2</sub>                                    | 9,540 <sup>2</sup>           | 201.3 <sup>3</sup>                                   | 1.62 (  )/0.18 (⊥) <sup>4</sup> |
| Copper                                               | 8,960*                       | 348.8*                                               | 392.81*                         |
| Bakelite                                             | 1,300*                       | 920*                                                 | 0.2*                            |
| Gold                                                 | 19,276*                      | 128.78*                                              | 317.32*                         |
| Kapton H                                             | 1,420*                       | 758*                                                 | 0.81*                           |
| Thermal grease                                       | 2,600*                       | 1,200*                                               | 8.5 <sup>5</sup>                |

\*Values obtained from the COMSOL Material library.

†Interfacial thermal resistance (ITR) between 15-nm-thick PtSe<sub>2</sub> and MoS<sub>2</sub>; ITR =  $1 \times 10^{-9}$  K.m<sup>2</sup>/W.

## 2. COMSOL settings for calculating the temperature distribution of the PtSe<sub>2</sub> thin films

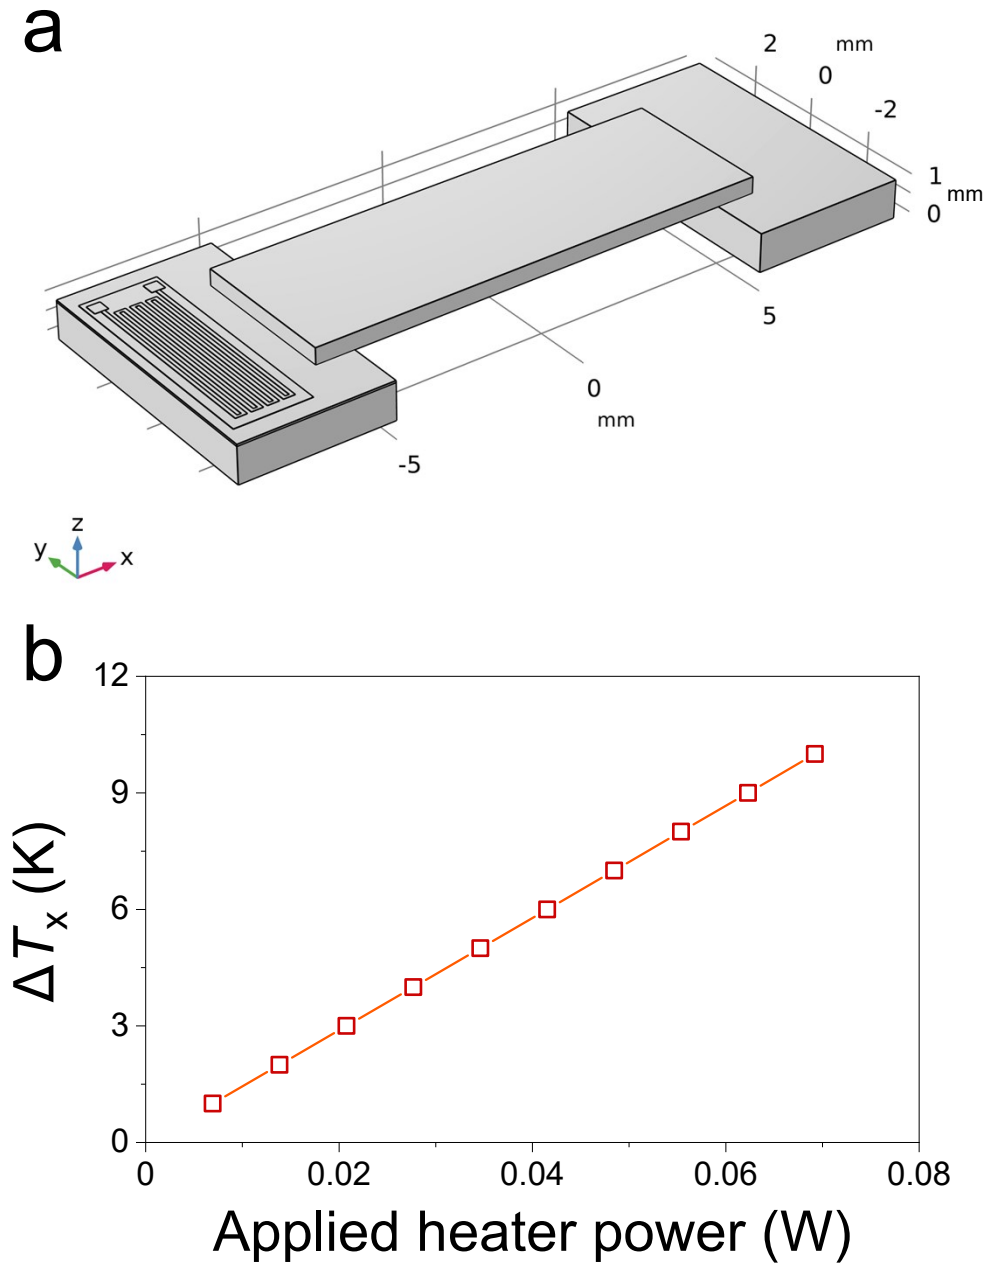

Fig. S1. (a) Geometry setting used to evaluate the in-plane temperature difference of PtSe<sub>2</sub>/sapphire substrate. (b) Calculated in-plane temperature difference ( $\Delta T_x$ ) at different applied heater powers.

### 3. Contact-type difference according to metal electrode

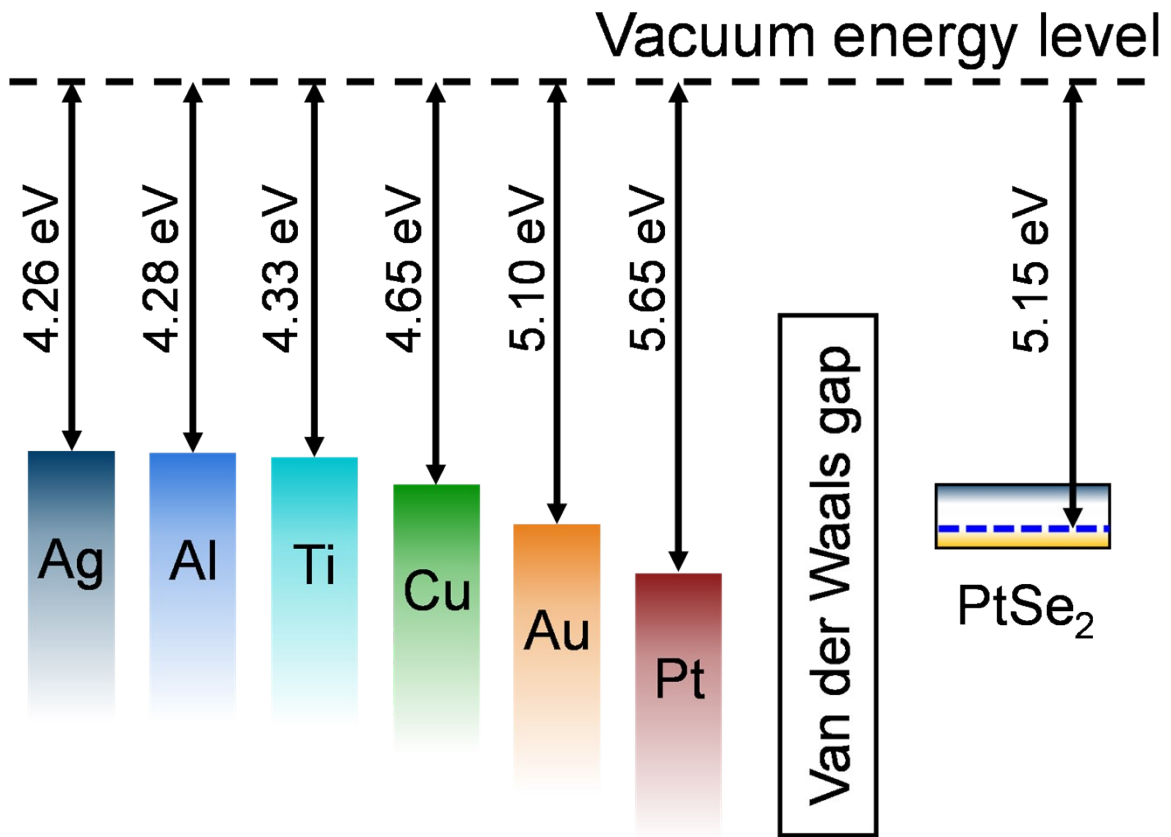

Fig. S2. Comparison between the work functions of the metal electrode and as-grown PtSe<sub>2</sub>.

#### 4. Calculated PDOS for layers IV–VI

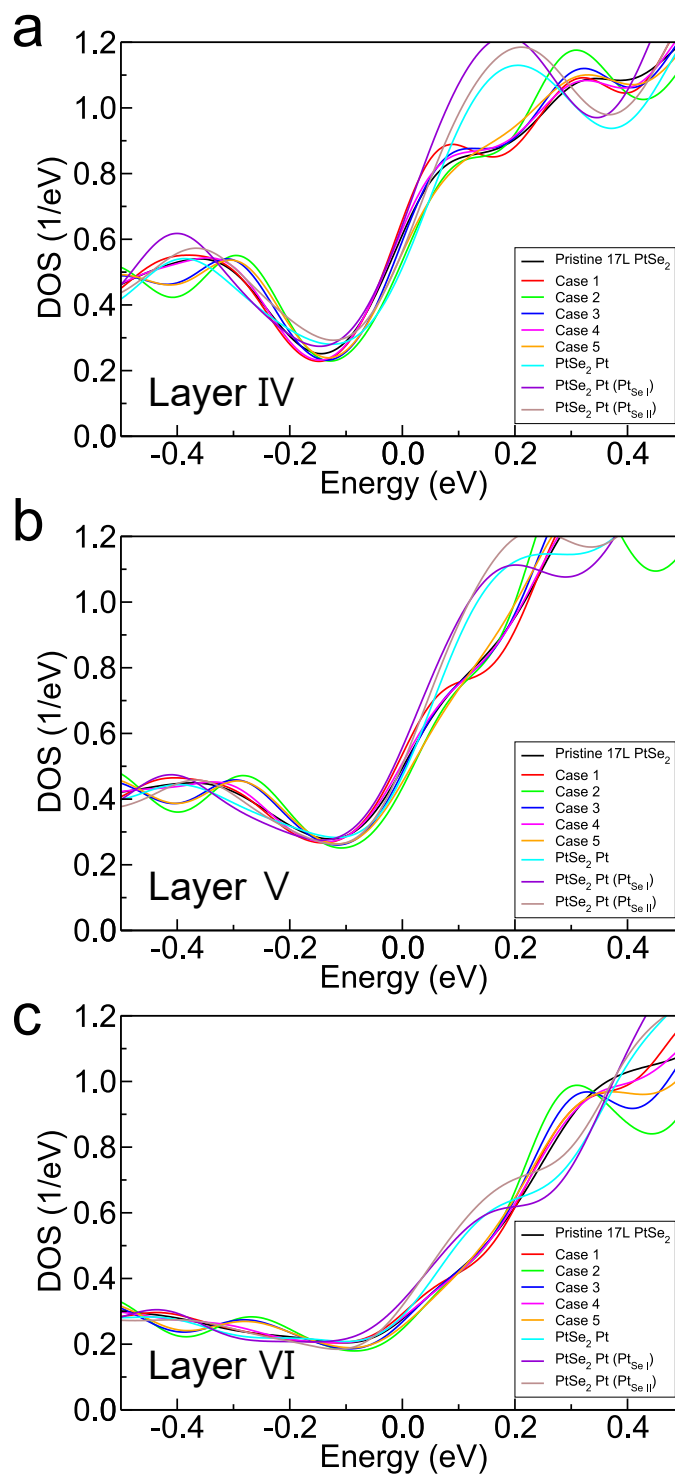

**Fig. S3.** Calculated PDOS of PtSe<sub>2</sub> and Pt/PtSe<sub>2</sub> for different layers: (a) IV layer, (b) V layer, and (c) VI layer.

## REFERENCES

1. 2 inch Sapphire Wafer C-Plane Single or Double Side Polish Al<sub>2</sub>O<sub>3</sub> Single Crystal. <https://www.msesupplies.com/products/2-sapphire-wafer-0001-single-crystal-al2o3?variant=11739873348> (accessed 2022-03-27).
2. El Sachat, A.; Xiao, P.; Donadio, D.; Bonell, F.; Sledzinska, M.; Marty, A.; Vergnaud, C.; Boukari, H.; Jamet, M.; Arregui, G.; Chen, Z.; Alzina, F.; Sotomayor Torres, C. M.; Chavez-Angel, E. Phonon dynamics and thermal conductivity of PtSe<sub>2</sub> thin films: Impact of crystallinity and film thickness on heat dissipation 2021, p. arXiv:2111.13395. <https://ui.adsabs.harvard.edu/abs/2021arXiv211113395E> (accessed 2021-11-01).
3. Maregedze, C. N. Numerical simulation of structural electronic, optical and thermal properties of platinum dichalcogenides. University of Witwatersrand, Johannesburg, 2019.
4. El Sachat, A.; Xiao, P.; Donadio, D.; Bonell, F.; Sledzinska, M.; Marty, A.; Vergnaud, C.; Boukari, H.; Jamet, M.; Arregui, G.; Chen, Z.; Alzina, F.; Sotomayor Torres, C. M.; Chavez-Angel, E. Effect of crystallinity and thickness on thermal transport in layered PtSe<sub>2</sub>. *NPJ 2D Materials and Applications* **2022**, *6* (1), 32.
5. MX-4. <https://www.arctic.de/en/MX-4/ACTCP00007B> (accessed 2022-03-27).
